# Supplementary material
Source: PubMed Central journal article supplement (PMC3514744)
Supplement: neo1411_1075SD1.pdf [file neo1411_1075SD1.pdf]

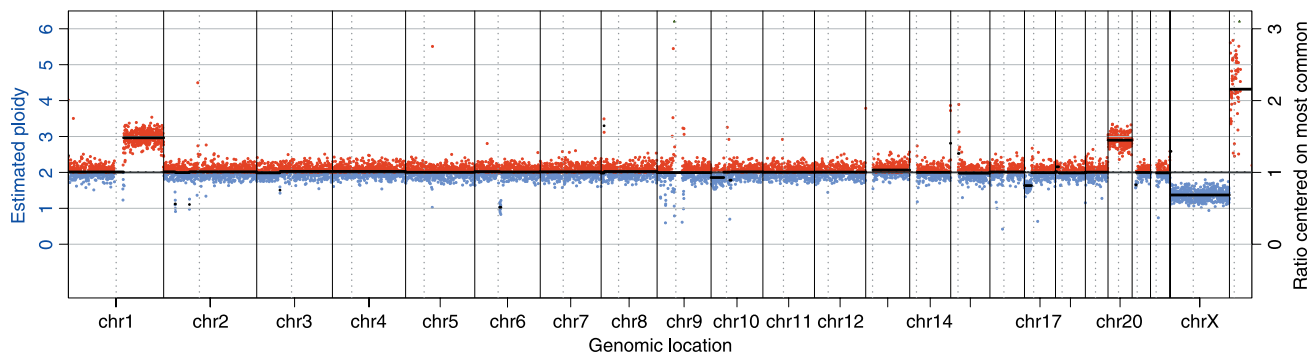

**Figure W1.** The karyogram for LIMM-NBE1. Estimated ploidy for LIMM-NBE1: a normal bronchial epithelium cell line that was created in-house by *h-TERT* transformation. The red dots show windows in which a copy number gain was inferred (normalized against pooled samples of normal tissue), whereas blue indicates regions of loss. The thick black line is the predicted ploidy.

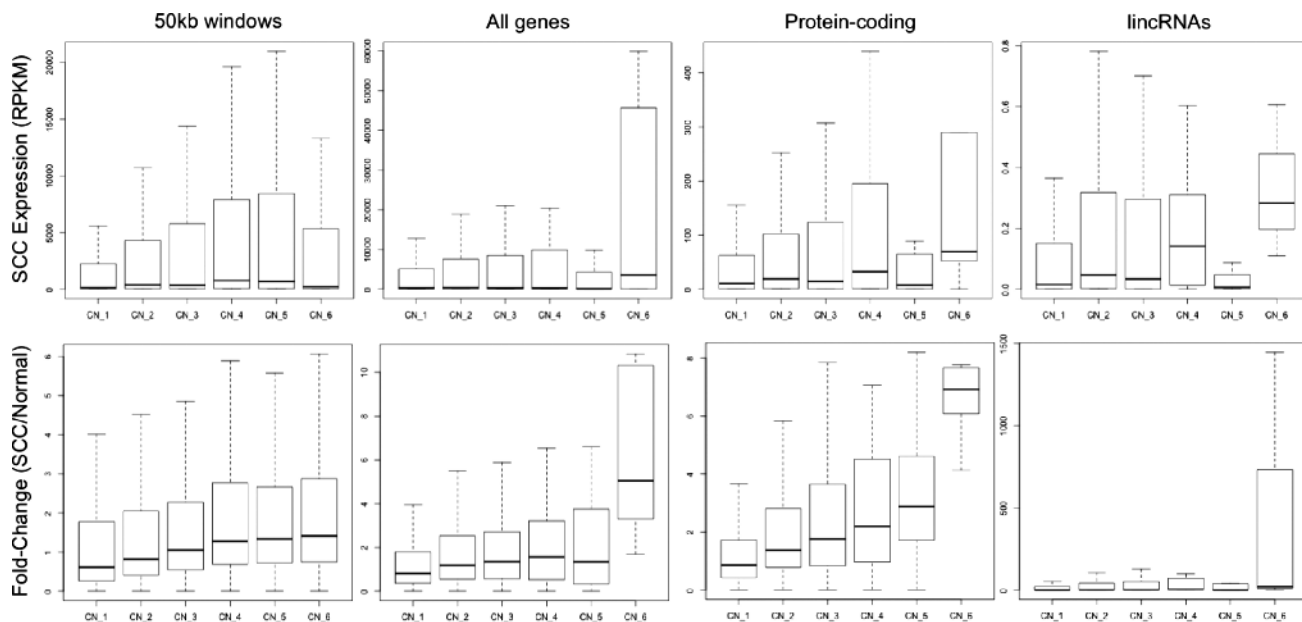

**Figure W2.** The effects of copy number on expression for different types of transcript or across 50-kb windows genome-wide. Boxplots showing the range of expression values in the tumor (top) or fold change in expression between normal and tumor (bottom) for different copy number, split by functional transcript class. Expression is quantified as RPKM. Ploidy is denoted as copy numbers 1 to 6 (CN<sub>1</sub>–CN<sub>6</sub>). SCC: squamous cell carcinoma.
